# Supplementary material
Source: PubMed Central journal article supplement (PMC7250558)
Supplement: mmc1.pdf [file mmc1.pdf]

# THE LANCET

## Rheumatology

### Supplementary appendix

This appendix formed part of the original submission and has been peer reviewed.  
We post it as supplied by the authors.

Supplement to: Gartshteyn Y, Askanase AD, Schmidt NM, et al. COVID-19 and systemic lupus erythematosus: a case series. *Lancet Rheumatol* 2020; published online May 26.  
[https://doi.org/10.1016/S2665-9913\(20\)30161-2](https://doi.org/10.1016/S2665-9913(20)30161-2).

|                                                                           | Confirmed<br>(n=10)                                                                                                                                                                                                                                                              |                                                    | Suspected<br>(n=8)                                                                                                                                                                                                                                                                                      |
|---------------------------------------------------------------------------|----------------------------------------------------------------------------------------------------------------------------------------------------------------------------------------------------------------------------------------------------------------------------------|----------------------------------------------------|---------------------------------------------------------------------------------------------------------------------------------------------------------------------------------------------------------------------------------------------------------------------------------------------------------|
|                                                                           | Hospitalised (n=7)                                                                                                                                                                                                                                                               | Outpatient (n=3)                                   | Outpatient (n=8)                                                                                                                                                                                                                                                                                        |
| Age, years                                                                | 41 (10)                                                                                                                                                                                                                                                                          | 52 (12)                                            | 40 (10)                                                                                                                                                                                                                                                                                                 |
| Women                                                                     | 6 (85%)                                                                                                                                                                                                                                                                          | 3 (100%)                                           | 7 (88%)                                                                                                                                                                                                                                                                                                 |
| Race or ethnicity                                                         |                                                                                                                                                                                                                                                                                  |                                                    |                                                                                                                                                                                                                                                                                                         |
| Hispanic                                                                  | 4 (57%)                                                                                                                                                                                                                                                                          | ..                                                 | 5 (63%)                                                                                                                                                                                                                                                                                                 |
| Black                                                                     | 2 (29%)                                                                                                                                                                                                                                                                          | 3 (100%)                                           | 2 (25%)                                                                                                                                                                                                                                                                                                 |
| Caucasian                                                                 | 1 (14%)                                                                                                                                                                                                                                                                          | ..                                                 | 1 (13%)                                                                                                                                                                                                                                                                                                 |
| Body-mass index, kg/m <sup>2</sup>                                        | 26 (8)                                                                                                                                                                                                                                                                           | 27 (5)                                             | 28 (8)                                                                                                                                                                                                                                                                                                  |
| Ever smoker                                                               | 1 (14%)                                                                                                                                                                                                                                                                          | 0                                                  | 2 (25%)                                                                                                                                                                                                                                                                                                 |
| Comorbidities                                                             |                                                                                                                                                                                                                                                                                  |                                                    |                                                                                                                                                                                                                                                                                                         |
| Hypertension                                                              | 3 (43%)                                                                                                                                                                                                                                                                          | 2 (67%)                                            | 4 (50%)                                                                                                                                                                                                                                                                                                 |
| Diabetes                                                                  | 0                                                                                                                                                                                                                                                                                | 0                                                  | 0                                                                                                                                                                                                                                                                                                       |
| Asthma                                                                    | 0                                                                                                                                                                                                                                                                                | 0                                                  | 2 (25%)                                                                                                                                                                                                                                                                                                 |
| SLE characteristics                                                       |                                                                                                                                                                                                                                                                                  |                                                    |                                                                                                                                                                                                                                                                                                         |
| Disease duration, years                                                   | 20 [10–30]                                                                                                                                                                                                                                                                       | 16 [4–20]                                          | 6 [3–16]                                                                                                                                                                                                                                                                                                |
| SLE disease activity index 2000 at last visit                             | 8 [2–12]                                                                                                                                                                                                                                                                         | 1 [0–4]                                            | 3 [0–6]                                                                                                                                                                                                                                                                                                 |
| Lupus nephritis (ever)                                                    | 6 (86%)                                                                                                                                                                                                                                                                          | 1 (33%)                                            | 4 (50%)                                                                                                                                                                                                                                                                                                 |
| Antiphospholipid syndrome                                                 | 3 (43%)                                                                                                                                                                                                                                                                          | 0                                                  | 0                                                                                                                                                                                                                                                                                                       |
| Antiphospholipid antibodies (ever)                                        | 3 (43%)                                                                                                                                                                                                                                                                          | 0                                                  | 2 (25%)                                                                                                                                                                                                                                                                                                 |
| Antinuclear antibodies                                                    | 7 (100%)                                                                                                                                                                                                                                                                         | 3 (100%)                                           | 8 (100%)                                                                                                                                                                                                                                                                                                |
| Positive double-stranded DNA before COVID-19                              | 4 (57%)                                                                                                                                                                                                                                                                          | 0                                                  | 6 (75%)                                                                                                                                                                                                                                                                                                 |
| Low C3 (<80 mg/dL) or low C4 (<14 mg/dL) before COVID-19                  | 2 (29%)                                                                                                                                                                                                                                                                          | 0                                                  | 2 (25%)                                                                                                                                                                                                                                                                                                 |
| Absolute lymphocytes before COVID, cells per $\mu$ L                      | 1.58 $\times$ 10 <sup>3</sup> (0.73)                                                                                                                                                                                                                                             | 1.60 $\times$ 10 <sup>3</sup> (0.73)               | 1.29 $\times$ 10 <sup>3</sup> (0.67)                                                                                                                                                                                                                                                                    |
| Baseline SLE medications                                                  |                                                                                                                                                                                                                                                                                  |                                                    |                                                                                                                                                                                                                                                                                                         |
| Hydroxychloroquine or chloroquine                                         | 3 (43%)                                                                                                                                                                                                                                                                          | 2 (67%)                                            | 8 (100%)                                                                                                                                                                                                                                                                                                |
| Non-biological immunosuppressants                                         | 6 (86%)                                                                                                                                                                                                                                                                          | 2 (67%)                                            | 5 (63%)                                                                                                                                                                                                                                                                                                 |
| Rituximab                                                                 | 0                                                                                                                                                                                                                                                                                | 1 (33%)                                            | 2 (25%)                                                                                                                                                                                                                                                                                                 |
| Prednisone                                                                | 2 (29%)                                                                                                                                                                                                                                                                          | 2 (67%)                                            | 3 (38%)                                                                                                                                                                                                                                                                                                 |
| Other medications                                                         |                                                                                                                                                                                                                                                                                  |                                                    |                                                                                                                                                                                                                                                                                                         |
| Angiotensin-converting enzyme inhibitor or angiotensin-2 receptor blocker | 2                                                                                                                                                                                                                                                                                | 2                                                  | 4                                                                                                                                                                                                                                                                                                       |
| Statins                                                                   | 1                                                                                                                                                                                                                                                                                | 0                                                  | 1                                                                                                                                                                                                                                                                                                       |
| Aspirin                                                                   | 1                                                                                                                                                                                                                                                                                | 0                                                  | 1                                                                                                                                                                                                                                                                                                       |
| Systemic anticoagulation                                                  | 3                                                                                                                                                                                                                                                                                | 0                                                  | 0                                                                                                                                                                                                                                                                                                       |
| COVID-19 symptoms                                                         | Cough, fever, and shortness of breath in five patients; one patient with syncope in setting of dyspnoea and low-grade fevers; one patient already in hospital (receiving plasmapheresis and intravenous immunoglobulin for antibody-mediated rejection of a transplanted kidney) | Fatigue, low-grade fevers, myalgia, and mild cough | Cough, fever, shortness of breath in five patients; one patient had fever, cough, pleurisy, and notable dyspnoea with peripheral oxygen saturation down to 90%; one patient had anosmia, ageusia, low-grade fevers, rhinorrhoea, and cough; one patient had subjective fevers and malaise (an immediate |

|                             |                                                                                                                                                                                                                                                                                                                                                                                                                                                   |                                                                                                                  |                                                             |
|-----------------------------|---------------------------------------------------------------------------------------------------------------------------------------------------------------------------------------------------------------------------------------------------------------------------------------------------------------------------------------------------------------------------------------------------------------------------------------------------|------------------------------------------------------------------------------------------------------------------|-------------------------------------------------------------|
|                             | developed new fever, hypoxia, and cough with rapid deterioration requiring endotracheal intubation, followed by a prolonged hospital course notable for acute respiratory distress syndrome and shock                                                                                                                                                                                                                                             |                                                                                                                  | family member was also diagnosed with COVID-19)             |
| COVID-19 targeted therapies | Five patients received antibiotics for empiric pneumonia coverage; two patients not on antimalarial therapy treated with hydroxychloroquine; three patients with hypoxemic respiratory failure (thought to have cytokine storm on the basis of C-reactive protein, erythrocyte sedimentation rate, ferritin, and interleukin-6 concentrations) received high-dose steroids (at least 1 mg/kg for 5 days) and tocilizumab (1–2 doses of 6–8 mg/kg) | Three patients prescribed an antibiotic; one patient not on antimalarial therapy treated with hydroxychloroquine | Two patients prescribed an antibiotic                       |
| COVID-19 outcomes           | One patient with hypoxemic respiratory failure gradually improved over 3-week hospital stay; two patients remained critically ill despite the interventions described above; four patients improved without requiring supplemental oxygen                                                                                                                                                                                                         | All patients improved without requiring supplemental oxygen                                                      | All patients improved without requiring supplemental oxygen |

Data are mean (SD), median (IQR), or n (%), unless otherwise indicated. SLE=systemic lupus erythematosus.

**Table: Clinical characteristics of 18 patients with SLE and confirmed or suspected COVID-19**
